# Supplementary material for: Microbial life on a sand grain: from bulk sediment to single grains
Source: PubMed Central journal article supplement (PMC5776476; doi:10.1038/ismej.2017.197), 2017-12-01
Supplement: ismej2017197x1.pdf [file ismej2017197x1.pdf]

1

2

## Microbial life on a sand grain: from bulk sediment to single grains

3

4

Probandt, D.<sup>1</sup>, Eickhorst, T.<sup>1,2</sup>, Ellrott, A.<sup>1</sup>, Amann, R.<sup>1</sup>, and Knittel, K.<sup>1\*</sup>,

5

6

7

8

<sup>1</sup>Max Planck Institute for Marine Microbiology, 28359 Bremen, Germany

9

<sup>2</sup>University of Bremen, Faculty 2 (Biology/Chemistry), 28359 Bremen,

10

Germany

11

12

13

## Supplementary Information

14

15

16

17

18

19

20

---

21 \*corresponding author

22 Katrin Knittel, Max Planck Institute for Marine Microbiology, Dept. Molecular

23 Ecology, Celsiusstraße 1, 28359 Bremen, Germany

24 email: [kknittel@mpi-bremen.de](mailto:kknittel@mpi-bremen.de)

25 Phone: +49 421 2028935

## 26 **Supplementary Methods**

27

### 28 **Micro-computed tomography ( $\mu$ CT)**

29 For micro-computed tomography, we subsampled the centre of undisturbed sediment  
30 from large push cores (diameter 40 mm) with a polyethylene (PE) cylinder (14 mm  
31 diameter  $\times$  30 mm height). Cylinders were gently pushed through an alignment adapter  
32 allowing a centered and straight generation of subsamples. The filled PE cylinders were  
33 placed on a permeable bandage and fixed on a custom-made rack in a sealed plastic  
34 container to prevent tipping over and allow liquid exchange from the bottom of the  
35 samples. The cylinders were filled with glass beads from the top to minimize  
36 resuspension effects of the sediment surface. Samples in PE cylinders were dehydrated  
37 in a graded series of acetone (70%, 80%, 90%, 2  $\times$  100% acetone). All solutions were  
38 added to the bottom of the container ensuring the entire replacement of the pore space.  
39 Samples in PE cylinders were resin impregnated in a desiccator under vacuum  
40 (220 mbar) using a polyester resin as previously described (Eickhorst and Tippkötter,  
41 2008). After polymerization (28 days) samples were removed from the PE cylinder and  
42 the base was polished orthogonal to the sampling axis. X-ray  $\mu$ -CT visualization was  
43 performed using scanning facilities at the Department of Geosciences, University of  
44 Bremen, Germany (CT-ALPHA, ProCon, Germany). Scan settings were optimized for  
45 the visualization of the resin-filled pore space and the inorganic sediment matrix at a  
46 resolution of 6.216  $\mu$ m per voxel. Radiographs were reconstructed into a three-  
47 dimensional volume using VOLEX (Fraunhofer IIS, Germany) and volume rendering  
48 and image extraction was done using Avizo 9.0.1 (FEI, USA). Horizontally orientated  
49  $\mu$ CT 2D images were subjected to local means 2D filter (Sigma 5) using FIJI. Stack  
50 dataset was analyzed using AMIRA (v. 6.3, FEI, The Netherlands) after manual

51 thresholding and segmentation into clearly separable pore space and solid phase. Solid  
52 phase surface was calculated and related to one cm<sup>3</sup>. For analysis of sediment porosity,  
53 grey-scale image stacks were segmented into binary images and processed with the fully  
54 automated adaptive window indicated Kriging algorithm as described (Houston et al.,  
55 2013).

56

### 57 **Calculations of cell density, colonized surface area and cells per sand grain**

58 The footprint of an average microbial cell was 0.43 μm<sup>2</sup>. The calculation is based on  
59 an estimated community composition of 50% small and 5% large cocci (diameter, on  
60 average 0.5 μm and 1 μm, respectively) and 30% small and 15% large rod-like cells  
61 (0.5 μm × 1 μm and 0.5 μm × 2 μm, respectively). The footprint is used together with  
62 the colonization density (cells cm<sup>-2</sup>) to determine the colonized fraction of the grain  
63 surface. Cell numbers per sand grains were calculated according to equation I:

64 **Eq. I**  $cells\ per\ sand\ grain = grain\ surface\ area\ [cm^2] \times colonization\ density\ [cm^{-2}]$ ,

65 where grain surface area is  $1.3 \times 10^{-3} cm^2$  and  $13 \times 10^{-3} cm^2$ , respectively, when  
66 assuming a perfect sphere with a diameter of 202 μm and 635 μm (size range for 80%  
67 of sand grains, n= 199)

68 or to equation II and III

69 **Eq. II**  $cells\ per\ sand\ grain = \frac{cells\ per\ cm^3\ sediment}{no.\ grains\ per\ cm^3\ sediment}$

70 **Eq. III**  $no.\ grains\ per\ cm^3 = \frac{volume\ of\ sediment\ [cm^3] \times (1 - porosity)}{volume\ of\ sand\ grain\ [cm^3]}$ ,

71 where porosity is 0.4 and grain volume is  $0.43 \times 10^{-5} cm^3$  (202 μm diameter) and  $13 \times$   
72  $10^{-5} cm^3$  (635 μm diameter).

73

74

75 **Cell-cell distance measurements**

76 Image z-stacks of three different sand grains stained with SYBR green I were  
77 obtained via confocal laser scanning microscopy (LSM 780, Carl Zeiss Microscopy  
78 GmbH, Germany) and visualized using a 3D maximum intensity projection (Imaris x64,  
79 Bitplane AG, Switzerland). We defined two types of areas on the sand grains based on  
80 their surface topology: i) exposed areas characterized by mainly convex and smooth  
81 surfaces with some microtopography and ii) protected areas with micro- and  
82 macrotopography (Supplementary Figure S4).

83 In total, seven regions of interest (ROI) of exposed areas and eleven ROI of protected  
84 areas from three different sand grains were analyzed with the software ACMEtool 3  
85 (July 2014; M. Zeder, Technobiology GmbH, Switzerland). The coordinates and area of  
86 each valid object was used to calculate a distance matrix for all identified valid objects  
87 per ROI (Supplementary Figure S3). Assuming all cells being spheres, the cell radius  
88 was estimated from the object area according to equation IV

89 **Eq. IV**  $radius = \sqrt{\frac{area}{\pi}}$

90 The object's central point was calculated from the bounding boxes' vertices' x- and y-  
91 coordinates according to equation Va and Vb.

92 **Eq. Va**  $center_x = left + \frac{right - left}{2}$

93 and

94 **Eq. Vb**  $center_y = top + \frac{bottom - top}{2}$

95 And the cell-cell distance according to **Eq. VI**

96  $distance_{1,2} = \sqrt{|center_{x2} - center_{x1}|^2 + |center_{y2} - center_{y1}|^2} - radius_1 - radius_2$

97 Only the closest neighbor was considered for calculations. Furthermore, only non-  
98 touching cells were included into the analysis thus the obtained values are  
99 overestimating the actual mean cell-cell distances. Applying this model on cell  
100 morphologies different from cocci/spheres, cell-cell distances would be under- or  
101 overestimated depending on their x/y/z-orientation to any other cell.

102

### 103 **CARD-FISH on sand grains**

104 Although SYBR green I staining of total cells showed bright signals, it was  
105 necessary for CARD-FISH to replace SYBR green I by DAPI. The green-emitting dyes  
106 were needed for tyramide labeling due to their high sensitivity. Up to four different  
107 HRP-labeled probes could successfully be applied in consecutive hybridizations without  
108 noticeable loss of signal intensity. Monolabeled and tetralabeled probes (except for  
109 *Planctomycetia*) did not work on sand grains due to too low brightness. Used tyramides  
110 were labeled with the standard dyes Alexa488, Alexa594 or Alexa647. For visualization  
111 of a fourth target group, we mixed Alexa488- and Alexa594-tyramides in an equimolar  
112 ratio for amplification, resulting in mixed-color signals. All targeted cells showed a  
113 comparably bright signal with both dyes, therefore, false positive cells showing only  
114 either of the colors can be excluded.

115

### 116 **Quality trimming and sequence processing**

117 Paired-end reads were quality trimmed (>q21, both ends) and merged (strict, overlap  
118 20) using software package BBmap (v. 36.92) at high confidence settings. A subset of  
119 100.000 sequences per sample was further processed according to the MiSeq SOP  
120 (Kozich et al., 2013) with mothur v.1.39.5 (Schloss et al., 2009; Westcott and Schloss,  
121 2017). For removal of potential artificial diversity, a pre-clustering at 99% sequence

122 identity and *de novo*-based chimera removal using UCHIME (Edgar et al., 2011) was  
123 performed. Afterwards, sequences were classified using the SILVA database SSU Ref  
124 NR, release 123 (Quast et al., 2013). All sequences that were classified as *Archaea*,  
125 chloroplast 16S rRNA or non-16S rRNA were removed from the dataset because they  
126 resulted from an unspecific PCR amplification and therefore do not represent the real  
127 diversity of *Archaea* and *Eukarya* on a sand grain or in bulk sediments. Remaining  
128 sequences were globally clustered in operational taxonomic units (OTU) at 97%  
129 similarity using the OptiClust algorithm. Finally, rare OTU<sub>0.97</sub> that were represented by  
130  $\leq 2$  sequences in the whole dataset, i.e. single sequence OTU absolute (SSO<sub>abs</sub>), and  
131 double sequence OTU absolute (DSO<sub>abs</sub>), were removed prior to diversity analysis. The  
132 removal of SSO<sub>abs</sub> and DSO<sub>abs</sub> has been done to reduce artificial diversity/noise as  
133 previously suggested for Illumina 16S rRNA gene fragment data (e.g. Allen et al.,  
134 2016). Removed SSO<sub>abs</sub> and DSO<sub>abs</sub> contributed each at maximum only 1 sequence of  
135 100.000 sequences in the entire data set. To test whether the removal of SSO<sub>abs</sub> and  
136 DSO<sub>abs</sub> from the whole dataset affected further statistical tests, we performed Procrustes  
137 correlation analysis (Gower, 1975) based on three-dimensional non-metric  
138 multidimensional scaling (NMDS) of the Bray-Curtis dissimilarity coefficient (Bray and  
139 Curtis, 1957) of two data sets. One data set containing all OTU<sub>0.97</sub> and one data set  
140 without SSO<sub>abs</sub> and DSO<sub>abs</sub>. The correlation of the two ordinations was highly  
141 significant (Procrustes correlation coefficient = 0.95, p=0.001, 999 permutations),  
142 indicating that the removal of SSO<sub>abs</sub> and DSO<sub>abs</sub> did not affect the overall trend. In the  
143 subsampled data set (44,901 sequences per sample) used for alpha diversity analysis,  
144 relative single sequence OTU and double sequence OTU (SSO<sub>rel</sub> and DSO<sub>rel</sub>) still  
145 remained in the database and thus are considered in the Chao1 estimator of total  
146 richness (Chao 1984).

147 **Diversity analysis**

148 For analysis of the alpha and beta diversity, the data sets were subsampled to lowest  
149 number of sequences in the total data set (N=44,901).

150 Alpha diversity analysis was performed based on phylotype- (OTU) and  
151 phylogenetic-based methods. Inverse Simpson (Simpson, 1949) and Chao1 (Chao,  
152 1984) were independently calculated 25 times using the R-package vegan (v.2.4,  
153 Oksanen et al., 2013) and customized R-scripts with OTU<sub>0.97</sub> and are displayed as a  
154 mean value. For calculation of Faith's phylogenetic diversity (Faith, 1992), a  
155 phylogenetic tree of OTU<sub>0.97</sub> representative sequences of the subsampled data set  
156 (N=44,901) was reconstructed using FastTree2 (Price et al., 2010) implemented in the  
157 ARB software package (Ludwig et al., 2004). Based on the phylogenetic tree, Faith's  
158 PD was calculated using the R-packages ape (v.4.1, Paradis et al., 2004) and picante  
159 (v. 1.6, Kembel et al., 2010).

160 Beta diversity analysis was performed based on phylotypes (OTU<sub>0.97</sub>) and their  
161 phylogenetic affiliation. To assess the (phylo)genetic distance between single sand  
162 grain's and replicate bulk sediment samples' bacterial communities, unweighted and  
163 weighted UniFrac distance matrices (Lozupone and Knight, 2005) were calculated  
164 based on the reconstructed phylogenetic tree using the R-package GUniFrac (v.1.0,  
165 Chen, 2012).

166 For quantification of the nestedness of the bacterial diversity from individual sand  
167 grains in the bulk sediments, occurrences of observed bulk sediment OTU<sub>0.97</sub> on sand  
168 grains were calculated. Therefor bulk\_1 to bulk\_3 data were pooled and compared to  
169 each single sand grain.

170

171

## 172 **Supplementary Results**

173

### 174 **Relative abundance and phylogeny of nitrifying *Bacteria* & *Archaea* and** 175 **chloroplast 16S rRNA gene tag sequences**

176 10,000 quality-trimmed and merged sequences from each sample (17 sand grains, 3  
177 bulk sediments) were submitted to the SILVAngs pipeline (Quast et al., 2013; database  
178 release 128). As output, SILVAngs provides aligned sequences which can be readily  
179 imported into the arb software package (Ludwig et al., 2004; Pruesse et al., 2007). In  
180 total,  $2 \pm 2\%$  retrieved from the 17 sand grains and  $2 \pm 0.7\%$  of total sequences retrieved  
181 from bulk sediments were assigned to ammonia- and nitrite-oxidizing bacteria. Most  
182 abundant were sequences affiliated with betaproteobacterial *Nitrosomonadales*  
183 ( $0.6 \pm 0.7\%$  of total bacterial sequences retrieved from single sand grains and  $0.2 \pm 0.1\%$   
184 from bulk sediments) and *Nitrospirae* ( $2 \pm 1\%$  and  $2 \pm 0.1\%$ ). Only of minor relative  
185 abundance were *Nitrospina* spp. ( $0.1 \pm 0.1\%$  and  $0.1 \pm 0.02\%$ ). Gammaproteobacterial  
186 *Nitrosococcus* and alphaproteobacterial *Nitrobacter* were found only sporadically on  
187 one sand grain in sequence abundances  $<0.01\%$ . The fraction of archaeal sequences  
188 were  $0.4 \pm 0.4\%$  and  $0.3 \pm 0.1\%$  of total sequences retrieved from single sand grains and  
189 bulk sediments, respectively. Archaeal sequences were not further analyzed because  
190 their amplification during PCR resulted from unspecific primer binding thus not  
191 covering the archaeal diversity. More than 99.9% of retrieved archaeal sequences were  
192 affiliated with *Thaumarchaeota* and *Woesearchaeota* DHVEG-6.

193 For phylogenetic analysis, sequences were added to the tree provided in SILVA  
194 database release 128 under parsimony criteria without allowing changes in the overall  
195 tree topology. In total, sequences affiliated with the order *Nitrosomonadales* formed 314  
196 OTU<sub>0.97</sub>. The tree was optimized using Parsimony interactive using the heuristic



197 optimizer (global optimization). All sequences were only distantly related to ammonia-  
198 oxidizing *Nitrosomonas* with 82.0-92% sequence similarity but closely related to  
199 *Nitrosopira multiformis* / *Nitrosovibrio tenuis* with 92.0-98.3% sequence similarity  
200 suggesting a common genus if not species (Yarza et al., 2014).

201 Sequences affiliated with *Nitrospirae* clustered into 1064 OTU<sub>0.97</sub>. More than 99%  
202 affiliated with *Nitrospira marina* (93-96% sequence similarity) suggesting that they  
203 derived from organisms of the same genus. They were only distantly related to  
204 “*Candidatus Nitrospira nitrificans*” and “*Candidatus Nitrospira nitrosa*” (83-89%) that  
205 have been described to be able of complete nitrification of ammonia to nitrate  
206 (comammox; Daims et al., 2015; van Kessel et al., 2015).

207 Plastid 16S rRNA gene sequences from chloroplasts made up  $3 \pm 3\%$  of total  
208 sequences retrieved from the sand grains and  $9 \pm 2\%$  retrieved from bulk sediments. All  
209 of them affiliated with sequences from *Bacillariophyceae* indicating that marine  
210 diatoms were the dominant microalgae on sand grains. A more specific taxonomic  
211 assignment was not possible based on their plastid 16S rRNA gene sequences.

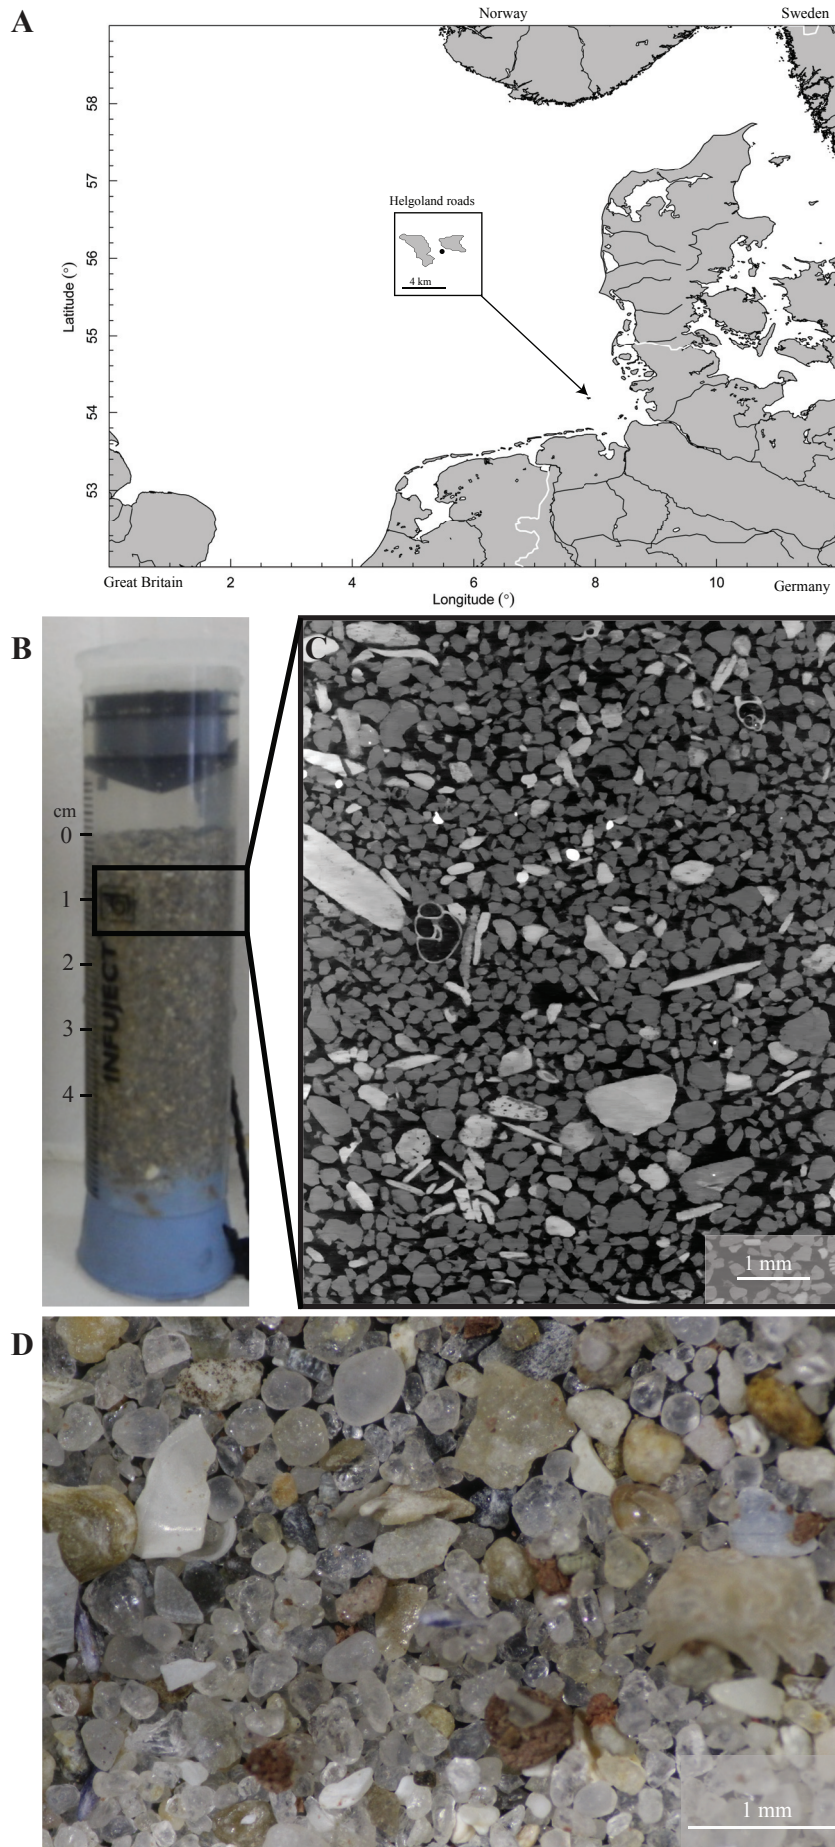

**Figure S1. Sublittoral surface sediment at site Helgoland Roads.**

A, Geographic location of sampling site Helgoland Roads in the southern North Sea. The close up shows the location of Helgoland Roads between the islands of Helgoland and Helgoland-Düne. B, sediment push core. C, reconstruction of sediment vertical section using  $\mu$ CT images. Pore space (black), solid phase composed of sand grains (dark to light grey) or shell debris (light grey, sharp edges). Shown section corresponds to a sediment depth of 0.5 cm to 1.5 cm below seafloor. D, binocular photograph of dried sand.

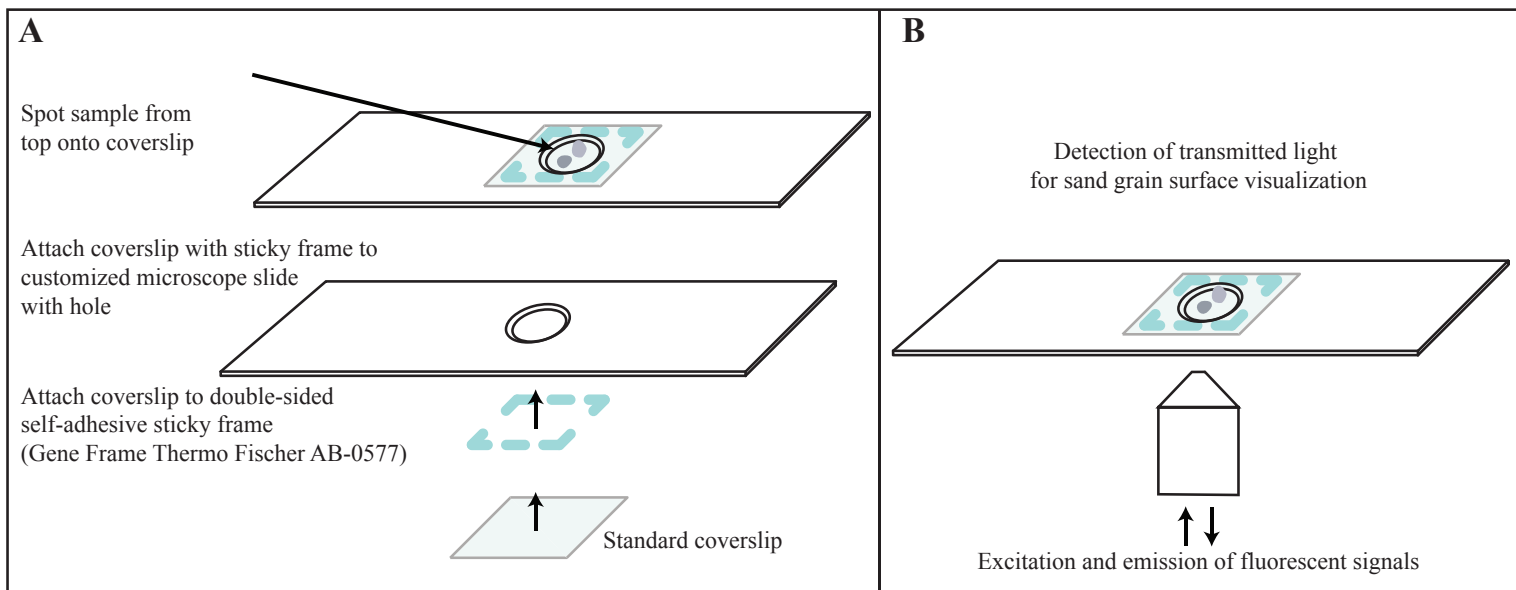

**Figure S2: Schematic drawing of customized glass slide for visualization of microbial cells on sand grains using inverse confocal laser scanning microscopy.**

A, slide preparation. A hole was drilled carefully using a standard household diamond drill. The sand grain was spotted through the hole on the cover slip and allowed to dry. Since the experimental set-up is not a closed system (air-contact to the top), heat-induced motion during long image acquisition was minimized. B, sample visualization using the inverse microscope.

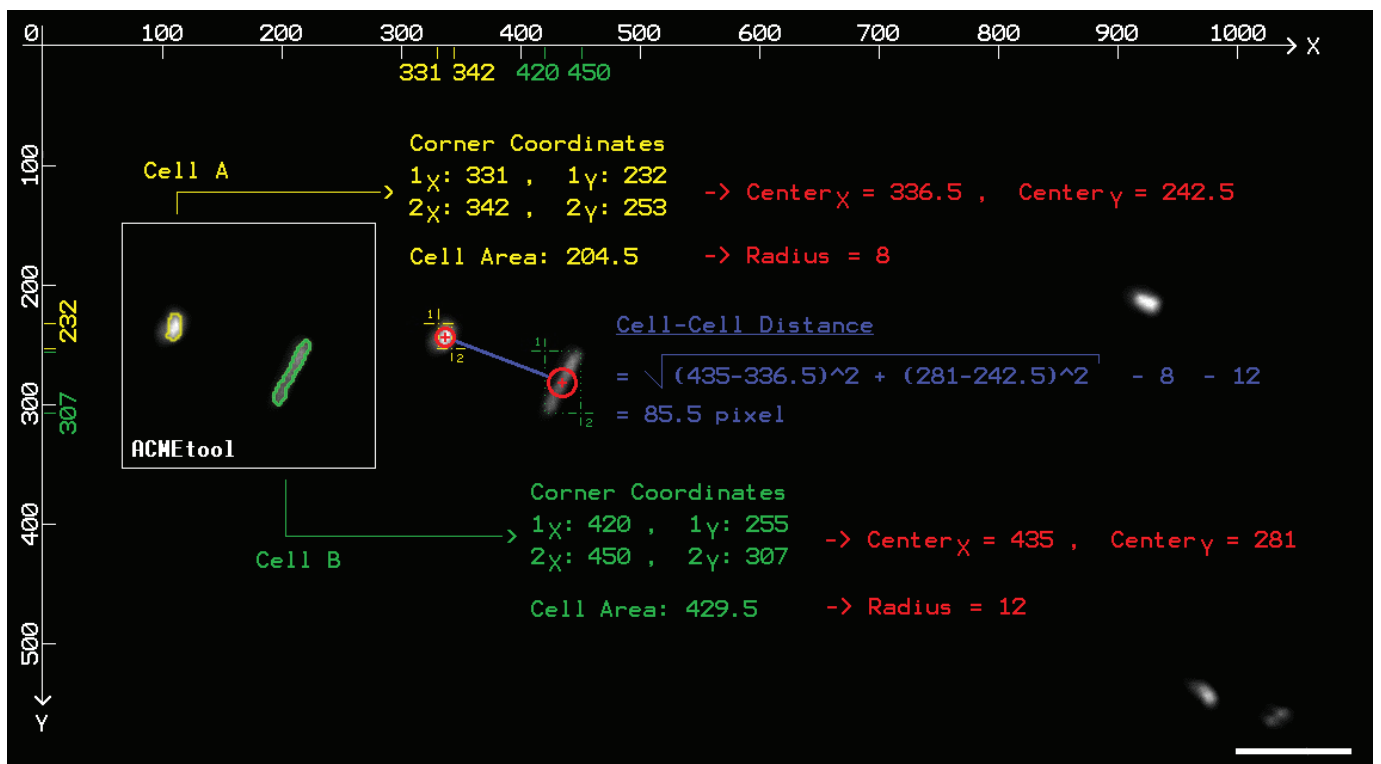

**Figure S3. Schematic diagram on cell-cell distance calculation.**

Step 1: Cell detection using ACME tool (white box). Step 2: Export of relevant cell features for further analysis (cell A shown in yellow, cell B shown in green). Step 3: Calculation of center point and radius for each cell (results shown in red color). Step 4: Cell-cell distance calculation (blue color). The calculation uses a pixel-based coordinate system. The scale bar corresponds to 7  $\mu\text{m}$ .

Figure S4

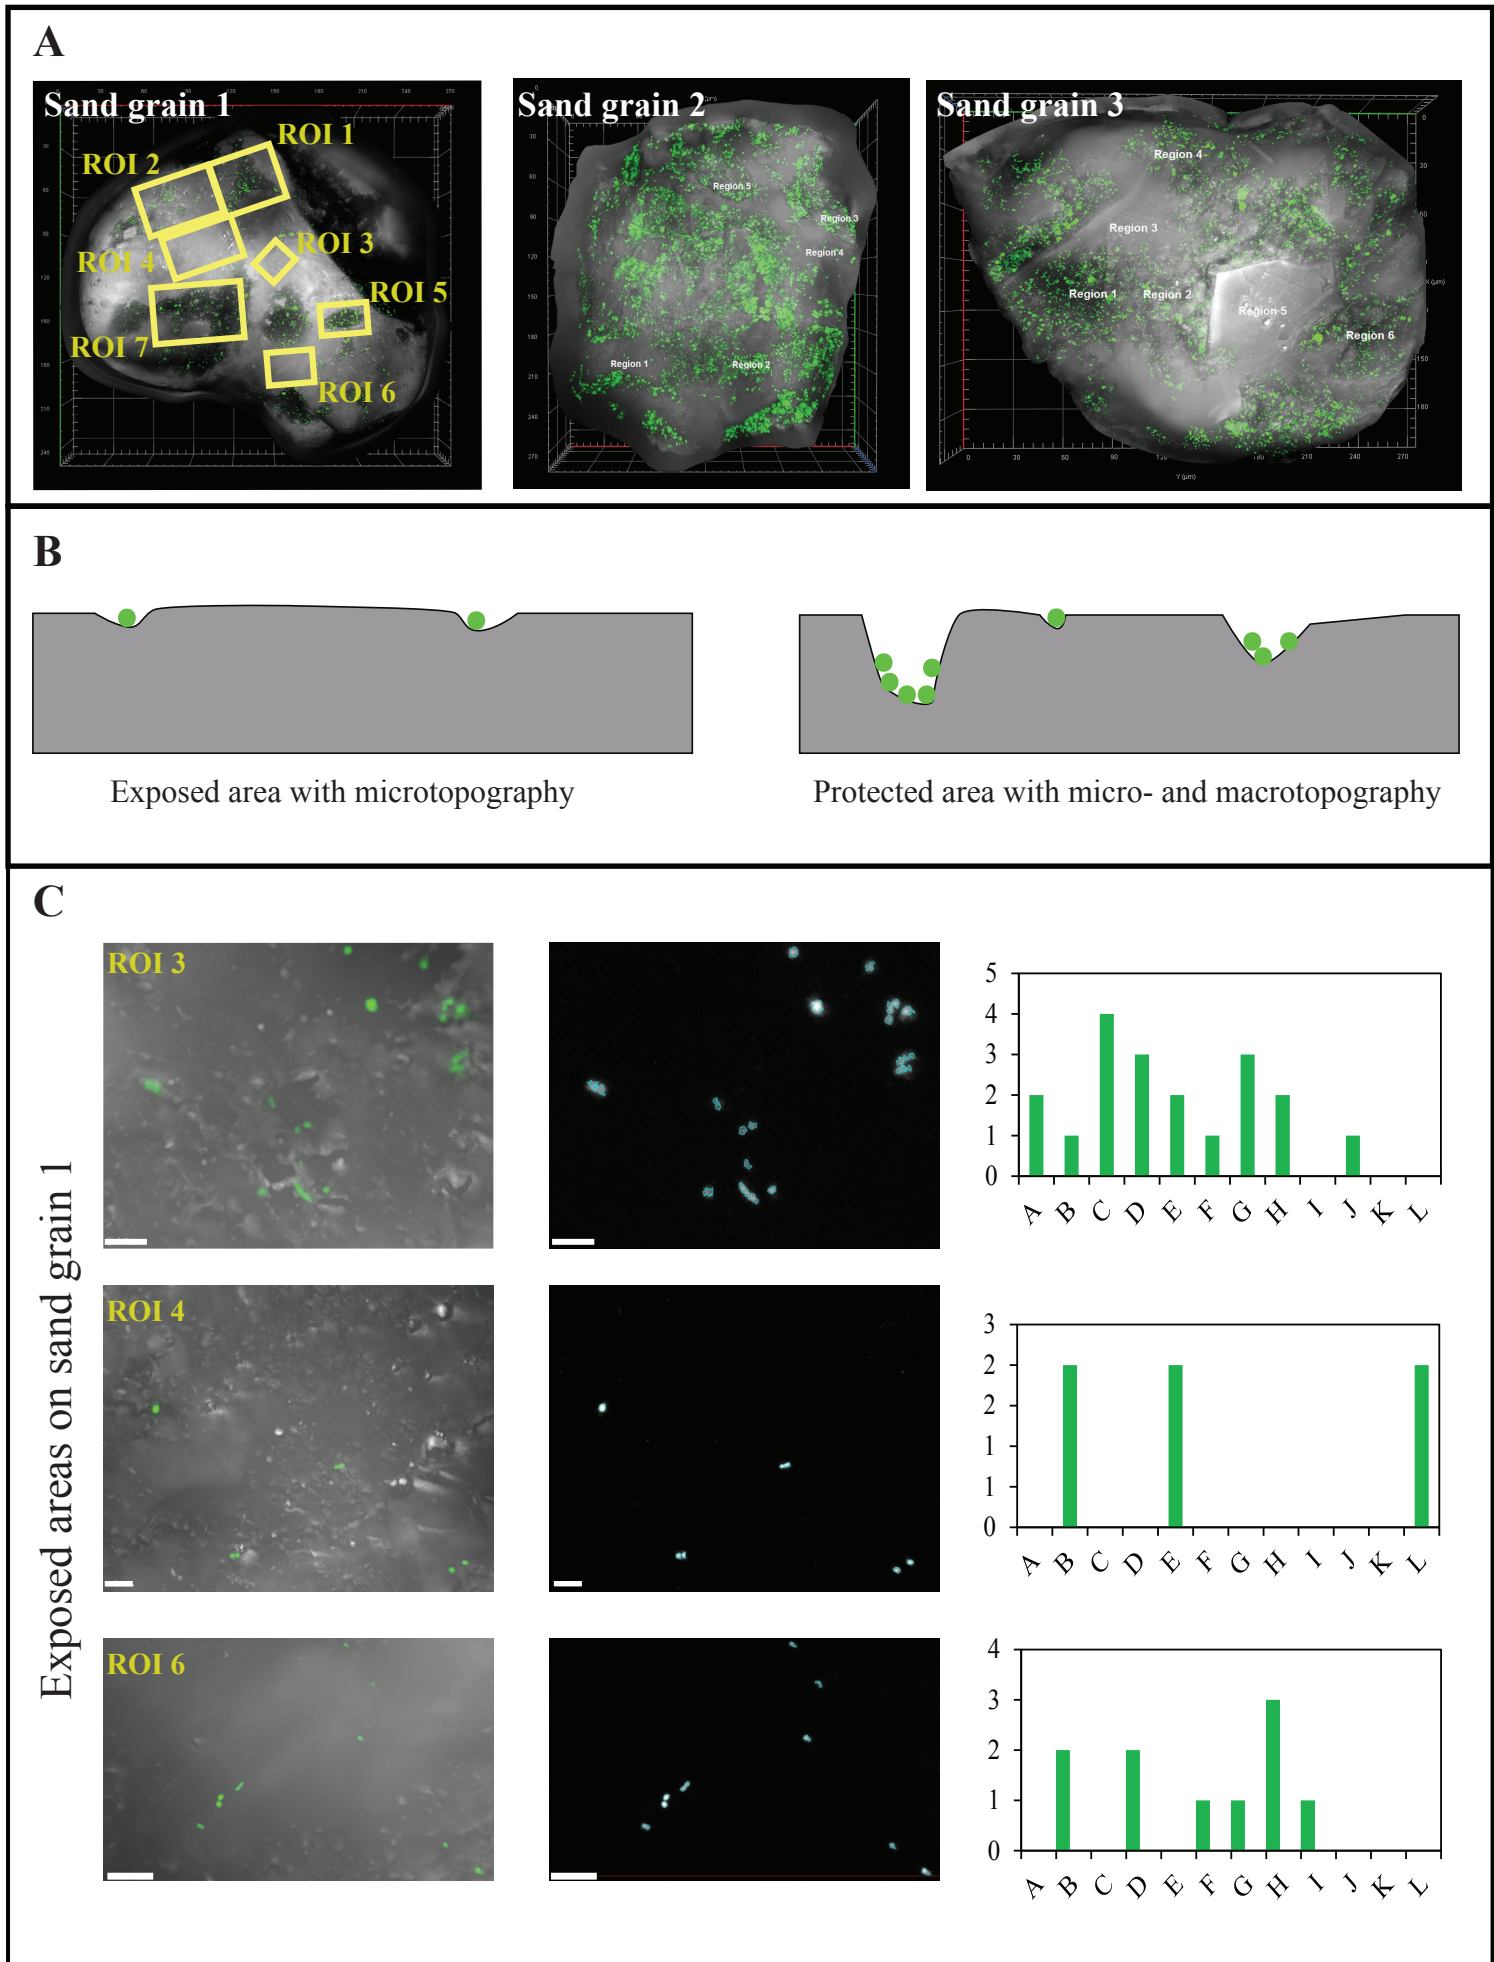

Figure S4, continued

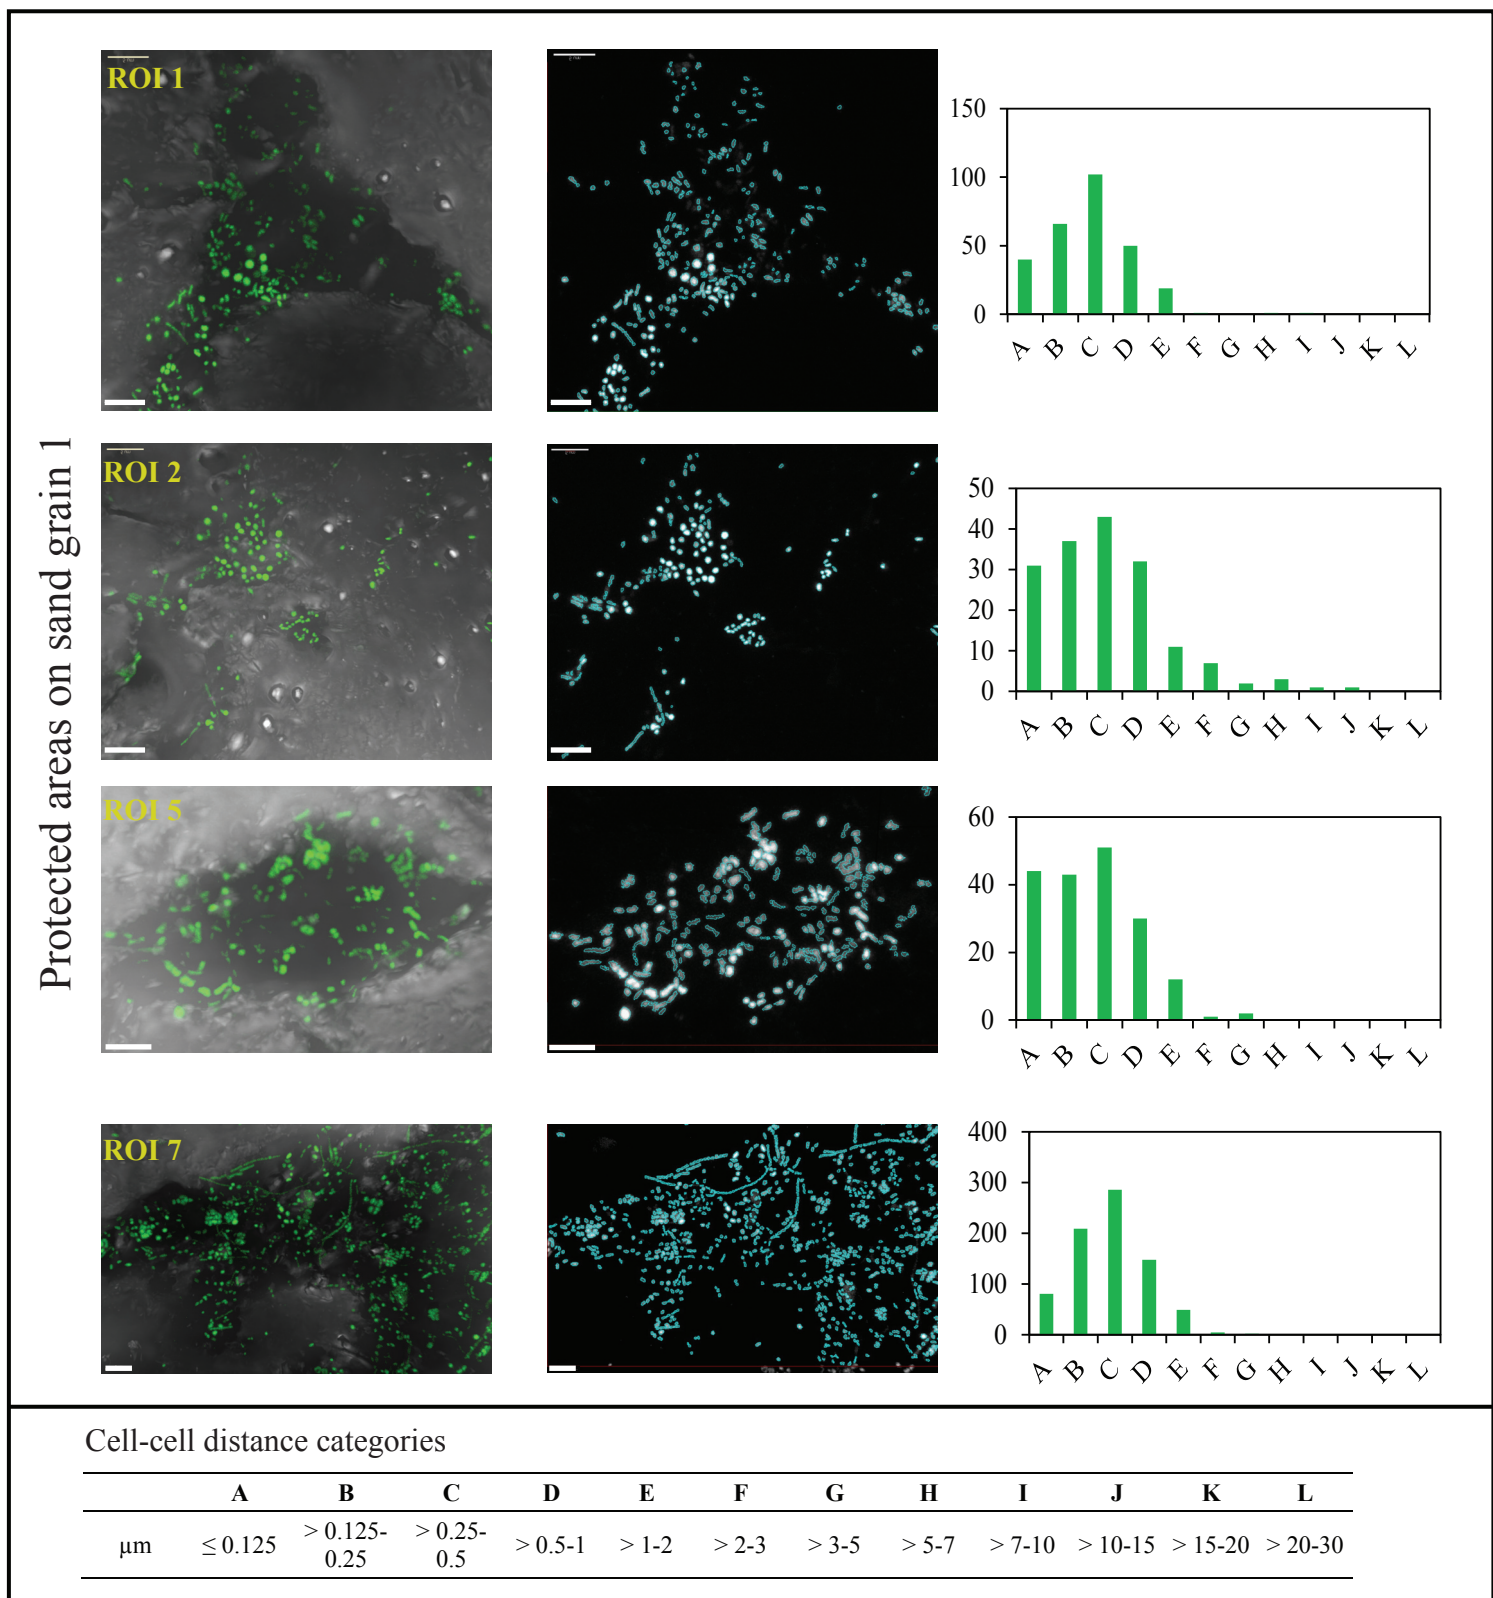

**Figure S4: Cell-cell distances in exposed and protected areas on sand grains.**

A, three representative sand grains stained with SYBR green I were analyzed for cell-cell distances in selected regions. B, schematic cross section of (left) an exposed area characterized by mainly convex and smooth surfaces with some microtopography and (right) protected areas with micro- and macrotopography. Green dots symbolize cells colonizing the sand grain's surface. C, exemplary for grain 1, regions of interest (ROI) of exposed (ROI 3, 4, 6) and protected (ROI 1, 2, 5, 7) areas and corresponding cell-cell distance measurements are shown. Left, micrograph of original ROI; middle, cell detection by ACMEtool; right, minimum cell-cell distance distribution as shown in distance classes. See key for distances in  $\mu\text{m}$ . Scale bar, 5  $\mu\text{m}$ .

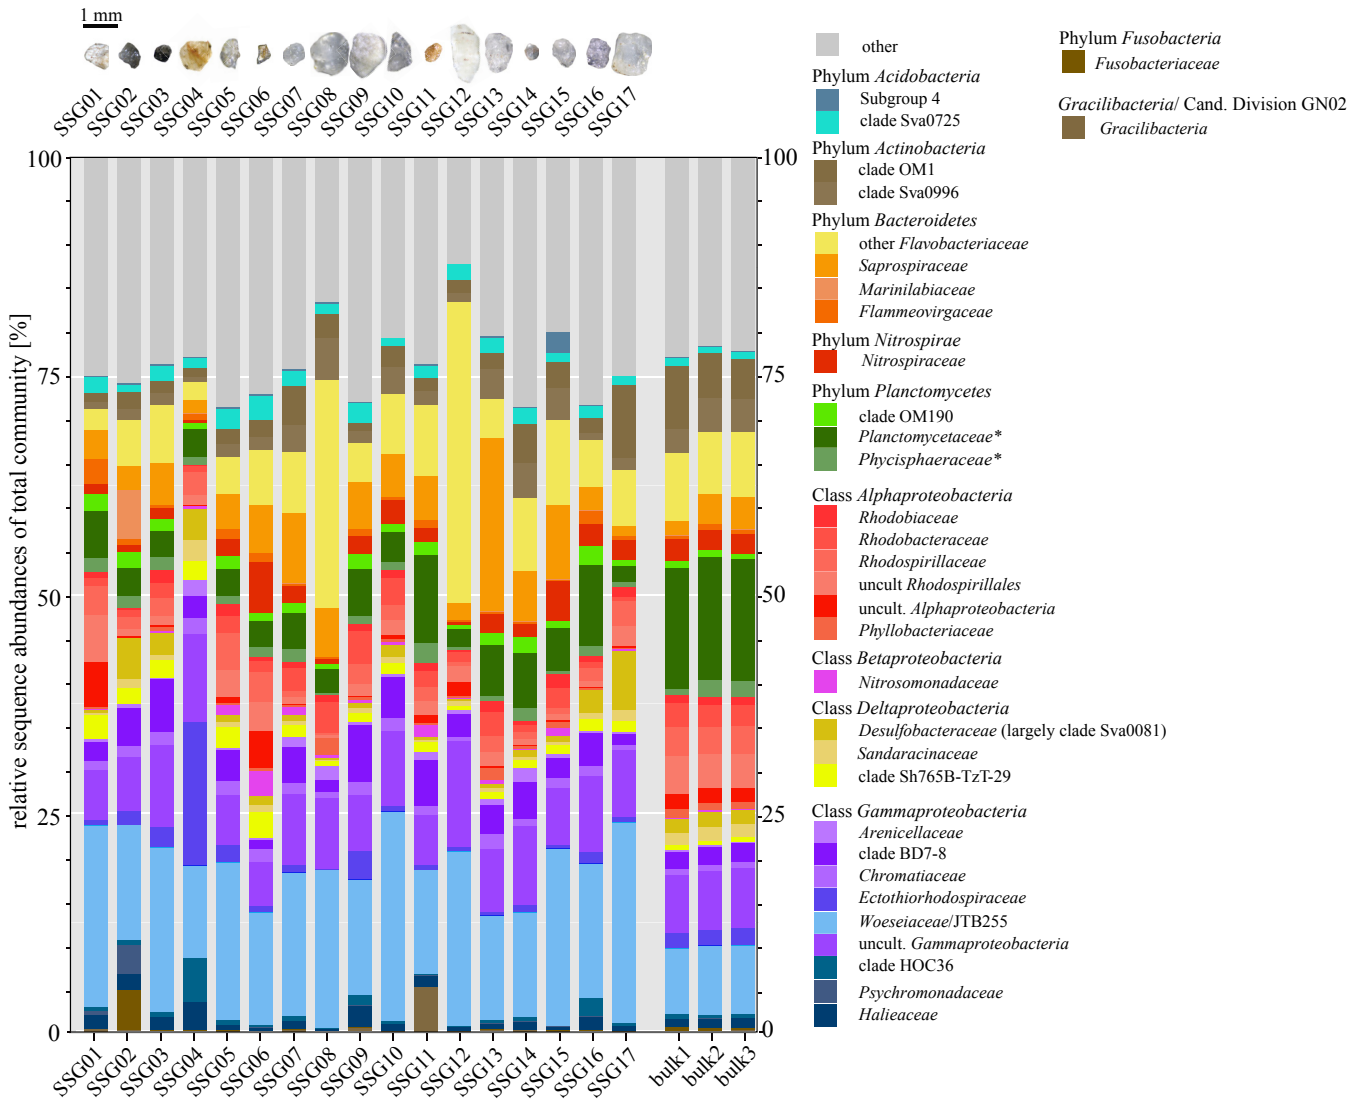

**Figure S5: Bacterial community composition on single sand grains and in bulk sediment as shown by Illumina partial 16S rRNA gene sequencing.**

Depicted are the 10 most sequence-abundant family-level clades found on the individual sand grains or in bulk sediment datasets. Remaining family level clades are summarized as “other”. Clades described as “uncultured (uncult)” could not be further classified and might contain numerous OTU<sub>0.97</sub> of respective taxon level. Depicted community composition is based on subsampled datasets (N=44,901). \* Sequences classified as *Planctomycetaceae* and *Phycisphaeraceae* rather comprise several unclassified families within the class *Planctomycetia* and *Phycisphaerae*, respectively.

**Table S1. Oligonucleotide probes used for CARD-FISH and FISH.**

| Probe name                      | Target                                                                                                     | Sequence (5' - 3')              | FA [%] <sup>1</sup> | Target   | Reference                          |
|---------------------------------|------------------------------------------------------------------------------------------------------------|---------------------------------|---------------------|----------|------------------------------------|
| EUB338 I                        |                                                                                                            | GCT GCC TCC CGT AGG AGT         | 35                  | 16S rRNA | Amann et al., 1990                 |
| EUB338 II                       | Most <i>Bacteria</i>                                                                                       | GCA GCC ACC CGT AGG TGT         | 35                  | 16S rRNA | Daims et al., 1999                 |
| EUB338 II                       |                                                                                                            | GCT GCC ACC CGT AGG TGT         | 35                  | 16S rRNA | Daims et al., 1999                 |
| ARCH915a                        | <i>Archaea</i>                                                                                             | GTG CTC CCC CGC CAA TTC CT      | 35                  | 16S rRNA | Stahl and Amann, 1991              |
| CREN537                         | Marine Group I <i>Thaumarcheota</i>                                                                        | TGA CCA CTT GAG GTG CTG         | 20                  | 16S rRNA | Teira et al, 2004                  |
| EUK516                          | <i>Eukarya</i>                                                                                             | ACC AGA CTT GCC CTCC            | 0                   | 18S rRNA | Amann et al., 1990                 |
| NON338                          | nonsense probe                                                                                             | ACT CCT ACG GGA GGC AGC         | 35                  | 16S rRNA | Wallner et al., 1993               |
| GAM42a <sup>2</sup>             | <i>Gammaproteobacteria</i>                                                                                 | GCC TTC CCA CAT CGT TT          | 35                  | 23S rRNA | Manz et al., 1992                  |
| GAM42a_T1038_G1031 <sup>2</sup> | <i>Xanthomonadaceae</i>                                                                                    | GCC TTT CCA CAT GGT TT          | 35                  | 23S rRNA | Siyambalapitiya and Blackall, 2005 |
| GAM42a_T1038 <sup>2</sup>       | <i>Xanthomonadaceae</i>                                                                                    | GCC TTT CCA CAT CGT TT          | 35                  | 23S rRNA | Siyambalapitiya and Blackall, 2005 |
| BET42a <sup>2</sup>             | <i>Betaproteobacteria</i>                                                                                  | GCC TTC CCA CTT CGT TT          | 35                  | 23S rRNA | Manz et al., 1992                  |
| JTB1270                         | <i>Woeseiaceae</i> /JTB255                                                                                 | GAG CTT TAA GGG ATT AGC GCA CCA | 40                  | 16S rRNA | Dyksma et al., 2016a               |
| hJTB1270                        | Unlabeled helper oligo, used with JTB1270                                                                  | TTG CTG GTT GGC AAC CCT CTG TAT | 40                  | 16S rRNA | Dyksma et al., 2016a               |
| CF968                           | <i>Bacteroidetes</i>                                                                                       | GGT AAG GTT CCT CGC GTA         | 30                  | 16S rRNA | Acinas et al., 2015                |
| NTSPA712                        | <i>Nitrospirae</i>                                                                                         | CGC CTT CGC CAC CGG CCT TCC     | 50                  | 16S rRNA | Daims et al., 2001                 |
| cNTSPA712                       | Unlabeled competitor used with NTSPA712                                                                    | CGC CTT CGC CAC CGG TGT TCC     |                     | 16S rRNA | Daims et al., 2001                 |
| NM645 <sup>3</sup>              | <i>Nitrospira</i> , <i>Nitrosovibrio</i> , some <i>Nitrosomonas</i> , uncultured <i>Nitrosomonadaceae</i>  | GCC ACA CTC TAG YCT TGT         | 20-30               | 16S rRNA | This study                         |
| c1NM645                         | Unlabeled competitor used with NM645                                                                       | GCC ACA CTC TAG CCT TGC         |                     | 16S rRNA | This study                         |
| c2NM645                         | Unlabeled competitor used with NM645                                                                       | GCC ACA CTC CAG CCT TGC         |                     | 16S rRNA | This study                         |
| NM478 <sup>3</sup>              | <i>Nitrospira</i> , <i>Nitrosovibrio</i> , uncultured <i>Nitrosomonadaceae</i> , some <i>Acidobacteria</i> | TCT TCC GGT ACC GTC AGT A       | 20-30               | 16S rRNA | This study                         |
| cNM478                          | Unlabeled competitor used with NM478                                                                       | TCT TCC GGT ACC GTC AGM A       |                     | 16S rRNA | This study                         |
| PLA46 <sup>4</sup>              | <i>Planctomycetes</i> except <i>Phycisphaerae</i>                                                          | GAC TTG CAT GCC TAA TCC         | 30                  | 16S rRNA | Neef et al., 1998                  |
| PHYC309                         | <i>Phycisphaerae</i>                                                                                       | AGT GTC TCA GTC CCG ATG CGG CG  | 35                  | 16S rRNA | Probandt et al., 2017              |

<sup>1</sup>: formamide concentration in the hybridization buffer.

<sup>2</sup>: Probes GAM42a, GAM42a\_T1038\_G1031 and GAM42a\_T1038 were used as “GAM42a-mix” at a molar ratio of 1:1:1 together with Bet42a as competitor.

<sup>3</sup>: Probe NM645 is recommended to use. It gives brighter signals than NM478 and has no not-target hits.

<sup>4</sup>: Probe Pla46 was used HRP-labeled or directly labeled with four Alexa594 dye molecules using CLICK chemistry



**Table S2: Alpha diversity parameters for single sand grains and bulk sediments based on 16S rRNA gene Illumina tag sequencing.** Depicted diversity values show the mean of 25 independent calculations. OTU<sub>0.97</sub> only represented by one or two sequences in the total dataset (SSO<sub>abs</sub> and DSO<sub>abs</sub>; ~0.000001% relative sequence abundance) were excluded from analysis. SSO<sub>abs</sub>, absolute single sequence OTU<sub>0.97</sub>; DSO<sub>abs</sub>, absolute double sequence OTU<sub>0.97</sub> Relative single sequence OTU<sub>0.97</sub> (SSO<sub>rel</sub>) are OTU<sub>0.97</sub> that occur only once in the respective sample but are more sequence-abundant in other samples of the entire data set.

| sample | Quality reads | Subsampled to 44,901 reads each sample |        |                 |                           |                           |                           |               |
|--------|---------------|----------------------------------------|--------|-----------------|---------------------------|---------------------------|---------------------------|---------------|
|        | [No.]         | observed OTU <sub>0.97</sub>           | Chao1  | inverse Simpson | SSO <sub>abs</sub><br>[%] | SSO <sub>rel</sub><br>[%] | DSO <sub>abs</sub><br>[%] | Faith's<br>PD |
| SSG01  | 45,980        | 5,446                                  | 9,231  | 69              | 1.5                       | 48.1                      | 8.1                       | 295           |
| SSG02  | 46,555        | 5,032                                  | 7,977  | 87              | 1.8                       | 41.6                      | 7.5                       | 284           |
| SSG03  | 53,143        | 5,235                                  | 8,673  | 85              | 2.3                       | 44.7                      | 7.6                       | 297           |
| SSG04  | 55,507        | 3,426                                  | 5,260  | 68              | 2.2                       | 37.7                      | 9.0                       | 222           |
| SSG05  | 58,205        | 5,007                                  | 8,764  | 114             | 2.1                       | 47.2                      | 7.5                       | 280           |
| SSG06  | 53,230        | 4,373                                  | 7,070  | 112             | 2.1                       | 43.3                      | 8.7                       | 253           |
| SSG07  | 56,972        | 4,369                                  | 7,327  | 103             | 1.8                       | 44.8                      | 6.4                       | 253           |
| SSG08  | 55,758        | 4,088                                  | 7,716  | 49              | 1.9                       | 52.3                      | 7.7                       | 236           |
| SSG09  | 52,930        | 5,470                                  | 9,742  | 128             | 1.9                       | 48.2                      | 7.9                       | 292           |
| SSG10  | 47,116        | 5,198                                  | 8,888  | 63              | 1.3                       | 48.5                      | 7.9                       | 277           |
| SSG11  | 50,657        | 4,407                                  | 7,180  | 92              | 2.2                       | 42.6                      | 8.2                       | 253           |
| SSG12  | 58,769        | 4,126                                  | 7,293  | 44              | 1.9                       | 49.8                      | 8.4                       | 227           |
| SSG13  | 46,215        | 5,359                                  | 9,787  | 82              | 1.8                       | 49.9                      | 7.0                       | 288           |
| SSG14  | 44,901        | 5,160                                  | 9,008  | 136             | 1.8                       | 46.2                      | 7.4                       | 290           |
| SSG15  | 47,901        | 4,866                                  | 8,783  | 78              | 1.8                       | 50.4                      | 7.6                       | 265           |
| SSG16  | 46,828        | 5,955                                  | 9,949  | 106             | 1.9                       | 44.0                      | 7.6                       | 326           |
| SSG17  | 45,131        | 6,031                                  | 10,692 | 58              | 1.8                       | 50.8                      | 9.1                       | 317           |
| bulk1  | 75,134        | 6,759                                  | 13,059 | 230             | 3.9                       | 51.2                      | 10.0                      | 348           |
| bulk2  | 129,394       | 6,797                                  | 13,119 | 215             | 4.0                       | 51.4                      | 10.8                      | 354           |
| bulk3  | 137,585       | 6,924                                  | 14,155 | 226             | 4.2                       | 52.3                      | 9.8                       | 358           |

**Table S3: Beta-diversity.**

Genetic similarity between single sand grain and bulk sediment communities measured by UniFrac and expressed as shared phylogenetic branch length. Color code corresponds to proportion of shared branch length: low (red) to high proportion (green). Panel A. Unweighted UniFrac, B. Weighted UniFrac. Calculations performed on OTU<sub>0.97</sub> representative sequences of subsampled data sets (N=44.901).

**A**

|       | SSG 1 | SSG 2 | SSG 3 | SSG 4 | SSG 5 | SSG 6 | SSG 7 | SSG 8 | SSG 9 | SSG 10 | SSG 11 | SSG 12 | SSG 13 | SSG 14 | SSG 15 | SSG 16 | SSG 17 | Bulk 1 | Bulk 2 |
|-------|-------|-------|-------|-------|-------|-------|-------|-------|-------|--------|--------|--------|--------|--------|--------|--------|--------|--------|--------|
| SSG2  | 46    |       |       |       |       |       |       |       |       |        |        |        |        |        |        |        |        |        |        |
| SSG3  | 47    | 49    |       |       |       |       |       |       |       |        |        |        |        |        |        |        |        |        |        |
| SSG4  | 42    | 44    | 44    |       |       |       |       |       |       |        |        |        |        |        |        |        |        |        |        |
| SSG5  | 47    | 46    | 48    | 43    |       |       |       |       |       |        |        |        |        |        |        |        |        |        |        |
| SSG6  | 44    | 41    | 44    | 42    | 47    |       |       |       |       |        |        |        |        |        |        |        |        |        |        |
| SSG7  | 46    | 46    | 49    | 45    | 47    | 46    |       |       |       |        |        |        |        |        |        |        |        |        |        |
| SSG8  | 42    | 40    | 43    | 40    | 42    | 42    | 45    |       |       |        |        |        |        |        |        |        |        |        |        |
| SSG9  | 48    | 48    | 48    | 43    | 49    | 44    | 47    | 42    |       |        |        |        |        |        |        |        |        |        |        |
| SSG10 | 44    | 46    | 47    | 42    | 46    | 43    | 48    | 42    | 47    | 45     |        |        |        |        |        |        |        |        |        |
| SSG11 | 45    | 44    | 47    | 43    | 47    | 44    | 48    | 42    | 47    | 45     |        |        |        |        |        |        |        |        |        |
| SSG12 | 43    | 43    | 44    | 41    | 42    | 42    | 45    | 44    | 44    | 43     | 43     |        |        |        |        |        |        |        |        |
| SSG13 | 46    | 48    | 48    | 43    | 48    | 45    | 49    | 45    | 49    | 48     | 46     | 43     |        |        |        |        |        |        |        |
| SSG14 | 49    | 46    | 48    | 42    | 44    | 42    | 47    | 43    | 46    | 46     | 44     | 43     | 46     |        |        |        |        |        |        |
| SSG15 | 44    | 44    | 46    | 41    | 46    | 44    | 47    | 48    | 46    | 48     | 44     | 43     | 49     | 45     |        |        |        |        |        |
| SSG16 | 50    | 49    | 49    | 42    | 46    | 41    | 46    | 39    | 47    | 45     | 44     | 40     | 46     | 49     | 43     |        |        |        |        |
| SSG17 | 46    | 47    | 47    | 41    | 44    | 41    | 44    | 40    | 45    | 46     | 42     | 40     | 45     | 48     | 43     | 50     |        |        |        |
| Bulk1 | 44    | 45    | 46    | 40    | 44    | 41    | 44    | 40    | 45    | 44     | 43     | 40     | 46     | 43     | 43     | 46     | 45     |        |        |
| Bulk2 | 44    | 45    | 46    | 41    | 44    | 41    | 44    | 40    | 46    | 44     | 42     | 41     | 45     | 43     | 43     | 46     | 46     | 54     |        |
| Bulk3 | 45    | 45    | 46    | 40    | 45    | 41    | 44    | 39    | 45    | 44     | 42     | 40     | 45     | 44     | 43     | 46     | 45     | 54     | 55     |

|      | SSG to SSG | Bulk to bulk | SSG to bulk |
|------|------------|--------------|-------------|
| Min  | 39         | 54           | 39          |
| Max  | 50         | 55           | 46          |
| Mean | 45         | 54           | 44          |

**B**

|       | SSG 1 | SSG 2 | SSG 3 | SSG 4 | SSG 5 | SSG 6 | SSG 7 | SSG 8 | SSG 9 | SSG 10 | SSG 11 | SSG 12 | SSG 13 | SSG 14 | SSG 15 | SSG 16 | SSG 17 | Bulk 1 | Bulk 2 |
|-------|-------|-------|-------|-------|-------|-------|-------|-------|-------|--------|--------|--------|--------|--------|--------|--------|--------|--------|--------|
| SSG2  | 70    |       |       |       |       |       |       |       |       |        |        |        |        |        |        |        |        |        |        |
| SSG3  | 76    | 78    |       |       |       |       |       |       |       |        |        |        |        |        |        |        |        |        |        |
| SSG4  | 68    | 69    | 72    |       |       |       |       |       |       |        |        |        |        |        |        |        |        |        |        |
| SSG5  | 78    | 71    | 82    | 68    |       |       |       |       |       |        |        |        |        |        |        |        |        |        |        |
| SSG6  | 75    | 71    | 78    | 62    | 82    |       |       |       |       |        |        |        |        |        |        |        |        |        |        |
| SSG7  | 71    | 75    | 81    | 63    | 77    | 77    |       |       |       |        |        |        |        |        |        |        |        |        |        |
| SSG8  | 55    | 62    | 64    | 50    | 60    | 63    | 72    |       |       |        |        |        |        |        |        |        |        |        |        |
| SSG9  | 80    | 75    | 82    | 69    | 81    | 76    | 79    | 61    |       |        |        |        |        |        |        |        |        |        |        |
| SSG10 | 71    | 72    | 84    | 66    | 81    | 78    | 82    | 66    | 79    |        |        |        |        |        |        |        |        |        |        |
| SSG11 | 69    | 71    | 75    | 58    | 71    | 71    | 75    | 65    | 76    | 71     |        |        |        |        |        |        |        |        |        |
| SSG12 | 54    | 61    | 61    | 50    | 56    | 59    | 63    | 80    | 58    | 60     | 63     |        |        |        |        |        |        |        |        |
| SSG13 | 70    | 72    | 75    | 60    | 75    | 74    | 81    | 75    | 78    | 78     | 76     | 69     |        |        |        |        |        |        |        |
| SSG14 | 70    | 76    | 75    | 60    | 70    | 71    | 85    | 72    | 76    | 75     | 77     | 65     | 79     |        |        |        |        |        |        |
| SSG15 | 67    | 70    | 76    | 58    | 73    | 76    | 83    | 74    | 75    | 79     | 72     | 64     | 81     | 79     |        |        |        |        |        |
| SSG16 | 75    | 78    | 78    | 68    | 74    | 72    | 75    | 60    | 80    | 73     | 78     | 59     | 74     | 79     | 70     |        |        |        |        |
| SSG17 | 66    | 67    | 74    | 66    | 74    | 70    | 71    | 59    | 69    | 77     | 61     | 53     | 66     | 67     | 69     | 68     |        |        |        |
| Bulk1 | 71    | 65    | 71    | 59    | 72    | 72    | 74    | 61    | 73    | 73     | 70     | 54     | 70     | 71     | 71     | 74     | 73     |        |        |
| Bulk2 | 71    | 68    | 73    | 60    | 72    | 73    | 76    | 62    | 74    | 74     | 73     | 56     | 72     | 74     | 72     | 76     | 71     | 93     |        |
| Bulk3 | 71    | 68    | 73    | 60    | 72    | 74    | 76    | 63    | 74    | 74     | 74     | 57     | 72     | 74     | 73     | 76     | 71     | 93     | 96     |

|      | SSG to SSG | Bulk to bulk | SSG to bulk |
|------|------------|--------------|-------------|
| Min  | 50         | 93           | 54          |
| Max  | 85         | 96           | 76          |
| Mean | 71         | 94           | 70          |

**Table S4: Fraction of bulk sediment OTU<sub>0.97</sub> present on a single sand grain.** The calculations were performed with different subsets of OTU<sub>0.97</sub>: i) all OTU<sub>0.97</sub>, ii) OTU<sub>0.97</sub> contributing > 0.01% to total sequences (excluding rare biosphere according to Galand and colleagues (2009), and iii) OTU<sub>0.97</sub> contributing > 0.1% to total sequences (excluding rare biosphere according to Pedrós-Alió (2012)). Data from bulk sediment samples (bulk\_1 to bulk\_3) were pooled prior to analysis.

|                               | OTU <sub>0.97</sub><br>no. | SSG<br>1 | SSG<br>2 | SSG<br>3 | SSG<br>4 | SSG<br>5 | SSG<br>6 | SSG<br>7 | SSG<br>8 | SSG<br>9 | SSG<br>10 | SSG<br>11 | SSG<br>12 | SSG<br>13 | SSG<br>14 | SSG<br>15 | SSG<br>16 | SSG<br>17 |
|-------------------------------|----------------------------|----------|----------|----------|----------|----------|----------|----------|----------|----------|-----------|-----------|-----------|-----------|-----------|-----------|-----------|-----------|
| OTU <sub>0.97</sub> *         | 22,505                     | 37       | 37       | 39       | 27       | 36       | 31       | 34       | 28       | 39       | 36        | 33        | 30        | 38        | 35        | 35        | 42        | 40        |
| OTU <sub>0.97</sub> (>0.1%)** | 5,173                      | 63       | 64       | 66       | 48       | 61       | 53       | 61       | 48       | 67       | 61        | 57        | 52        | 65        | 60        | 58        | 69        | 63        |
| OTU <sub>0.97</sub> (>1%)***  | 803                        | 87       | 85       | 85       | 73       | 86       | 80       | 84       | 77       | 89       | 84        | 82        | 77        | 88        | 83        | 82        | 87        | 85        |

\*: Each sample subsampled to 44,901 reads; \*\*: Each sample subsampled to 40,449 reads; \*\*\*: Each sample subsampled to 29,378 reads

## 212 **Supplementary References**

- 213 Acinas SG, Ferrera I, Sarmiento H, Díez-Vives C, Forn I, Ruiz-González C, et al.  
214 (2015). Validation of a new catalysed reporter deposition-fluorescence in situ  
215 hybridization probe for the accurate quantification of marine *Bacteroidetes*  
216 populations. *Environ Microbiol* 17: 3557-3569.
- 217 Allen HK, Bayles DO, Looft T, Trachsel J, Bass BE, Alt DP, et al. (2016). Pipeline for  
218 amplifying and analyzing amplicons of the V1–V3 region of the 16S rRNA gene.  
219 *BMC Research Notes* 9: 380.
- 220 Amann RI, Binder BJ, Olson RJ, Chisholm SW, Devereux R, Stahl DA. (1990).  
221 Combination of 16S rRNA-targeted oligonucleotide probes with flow cytometry for  
222 analyzing mixed microbial populations. *Appl Environ Microbiol* 56: 1919-1925.
- 223 Bray JR, and Curtis JT. (1957). An ordination of the upland forest communities of  
224 southern Wisconsin. *Ecol Monogr* 27: 326-349.
- 225 Chao A. (1984). Nonparametric estimation of the number of classes in a population.  
226 *Scand J Stat* 11: 265-270.
- 227 Chen J. (2012). GUniFrac: Generalized UniFrac distances. R-package version 1.0.
- 228 Daims H, Brühl A, Amann R, Schleifer KH, Wagner M. (1999). The domain-specific  
229 probe EUB338 is insufficient for the detection of all *Bacteria*: Development and  
230 evaluation of a more comprehensive probe set. *Syst Appl Microbiol* 22: 434-444.
- 231 Daims H, Nielsen JL, Nielsen PH, Schleifer KH, Wagner M. (2001). *In situ*  
232 characterization of *Nitrospira*-like nitrite-oxidizing bacteria active in wastewater  
233 treatment plants. *Appl Environ Microbiol* 67: 5273-5284.
- 234 Daims H, Lebedeva EV, Pjevac P, Han P, Herbold C, Albertsen M, et al. (2015).  
235 Complete nitrification by *Nitrospira* bacteria. *Nature* 528: 504-509.
- 236 Dykstra S, Bischof K, Fuchs BM, Hoffmann K, Meier D, Meyerdierks A, et al. (2016).  
237 Ubiquitous *Gammaproteobacteria* dominate dark carbon fixation in coastal  
238 sediments. *ISME J* 10: 1939-1953.
- 239 Edgar RC, Haas BJ, Clemente JC, Quince C, Knight R. (2011). UCHIME improves  
240 sensitivity and speed of chimera detection. *Bioinformatics* 27: 2194-2200.
- 241 Eickhorst T, Tippkötter R. (2008). Detection of microorganisms in undisturbed soil by  
242 combining fluorescence in situ hybridization (FISH) and micropedological methods.  
243 *Soil Biol Biochem* 40: 1284-1293.
- 244 Faith DP. (1992). Conservation evaluation and phylogenetic diversity. *Biol Conserv* 61:  
245 1-10.
- 246 Galand PE, Casamayor EO, Kirchman DL, and Lovejoy C. (2009). Ecology of the rare  
247 microbial biosphere of the Arctic Ocean. *Proc Natl Acad Sci USA* 106: 22427-  
248 22432.
- 249 Gower JC (1975). Generalized Procrustes analysis. *Psychometrika* 40:33-51
- 250 Houston AN, Otten W, Baveye PC, Hapca S. (2013). Adaptive-window indicator  
251 kriging: A thresholding method for computed tomography images of porous media.  
252 *Comput Geosci-Uk* 54: 239-248.

- 253 Kembel SW, Cowan PD, Helmus MR, Cornwell WK, Morlon H, Ackerly DD, et al.  
254 (2010). Picante: R tools for integrating phylogenies and ecology. *Bioinformatics* 26:  
255 1463-1464.
- 256 Kozich JJ, Westcott SL, Baxter NT, Highlander SK, Schloss PD. (2013). Development  
257 of a dual-index sequencing strategy and curation pipeline for analyzing amplicon  
258 sequence data on the MiSeq Illumina sequencing platform. *Appl Environ Microbiol*  
259 79: 5112-5120.
- 260 Lozupone C, and Knight R. (2005). UniFrac: a new phylogenetic method for comparing  
261 microbial communities. *Appl Environ Microbiol* 71: 8228-8235.
- 262 Ludwig W, Strunk O, Westram R, Richter L, Meier H, Yadhukumar, et al. (2004).  
263 ARB: a software environment for sequence data. *Nucleic Acids Res* 32: 1363–1371.
- 264 Manz W, Amann R, Ludwig W, Wagner M, Schleifer K-H. (1992). Phylogenetic  
265 oligodeoxynucleotide probes for the major subclasses of *Proteobacteria*: problems  
266 and solutions. *Syst Appl Microbiol* 15: 593-600.
- 267 Neef A, Amann R, Schlesner H, Schleifer K-H. (1998). Monitoring a widespread  
268 bacterial group: in situ detection of *Planctomycetes* with 16S rRNA-targeted probes.  
269 *Microbiol* 144: 3257-3266.
- 270 Oksanen J, Guillaume Blanchet F, Kindt R, Legendre P, Minchin PR, O'Hara RB, et al.  
271 (2013). vegan: Community ecology package. R package version 2.0-10.
- 272 Paradis E, Claude J, and Strimmer K. (2004). APE: analyses of phylogenetics and  
273 evolution in R language. *Bioinformatics* 20: 289-290.
- 274 Pedrós-Alió C. (2012). The rare bacterial biosphere. *Annu Rev Mar Sci* 4: 449-466.
- 275 Price MN, Dehal PS, and Arkin AP. (2010). FastTree 2 - approximately maximum-  
276 likelihood trees for large alignments. *PloS One* 5: e9490.
- 277 Pruesse E, Quast C, Knittel K, Fuchs BM, Ludwig WG, Peplies J, and Glöckner FO.  
278 (2007). SILVA: a comprehensive online resource for quality checked and aligned  
279 ribosomal RNA sequence data compatible with ARB. *Nucleic Acids Res* 35: 7188-  
280 7196.
- 281 Probandt D, Knittel K, Tegetmeyer HE, Ahmerkamp S, Holtappels M, Amann R.  
282 (2017). Permeability shapes bacterial communities in sublittoral surface sediments.  
283 *Environ Microbiol* 19: 1584-1599.
- 284 Pruesse E, Quast C, Knittel K, Fuchs, BM, Ludwig W, and Peplies J. (2007). SILVA: a  
285 comprehensive online resource for quality checked and aligned ribosomal RNA  
286 sequence data compatible with ARB. *Nucleic Acids Res* 35: 7188–7196.
- 287 Quast C, Pruesse E, Yilmaz P, Gerken J, Schweer T, Yarza P, et al. (2013). The SILVA  
288 ribosomal RNA gene database project: improved data processing and web-based  
289 tools. *Nucleic Acids Res* 41: D590-D596.
- 290 Schloss PD, Westcott SL, Ryabin T, Hall JR, Hartmann M, Hollister EB. et al. (2009).  
291 Introducing mothur: open-Source, platform-independent, community-supported  
292 software for describing and comparing microbial communities. *Appl Environ*  
293 *Microbiol* 75: 7537-7541.
- 294 Simpson EH. (1949). Measurement of diversity. *Nature* 163: 688-688.

- 295 Siyambalapitiya N, Blackall LL. (2005). Discrepancies in the widely applied GAM42a  
296 fluorescence in situ hybridisation probe for *Gammaproteobacteria*. FEMS Microbiol  
297 Lett 242: 367-373.
- 298 Stahl DA, Amann R. (1991). Nucleic acid techniques in bacterial systematics. in:  
299 Stackebrandt. E., Goodfellow. M. (Eds.). John Wiley & Sons Ltd., Chichester.  
300 England. pp. 205-248.
- 301 Teira E, Reinthaler T, Pernthaler A, Pernthaler J, Herndl GJ. (2004). Combining  
302 catalyzed reporter deposition-fluorescence in situ hybridization and  
303 microautoradiography to detect substrate utilization by bacteria and archaea in the  
304 deep ocean. Appl Environ Microbiol 70: 4411-4414.
- 305 van Kessel MAHJ, Speth DR, Albertsen M, Nielsen PH, Op den Camp HJM, Kartal B,  
306 et al. (2015). Complete nitrification by a single microorganism. Nature 528: 555-559.
- 307 Wallner G, Amann R, Beisker W. (1993). Optimizing fluorescent in situ hybridization  
308 with rRNA-targeted oligonucleotide probes for flow cytometric identification of  
309 microorganisms. Cytometry 14: 136-143.
- 310 Westcott SL, Schloss PD. (2017). OptiClust, an improved method for assigning  
311 amplicon-based sequence data to operational taxonomic units. mSphere 2:  
312 10.1128/mSphereDirect.00073-00017.
- 313 Yarza P, Yilmaz P, Pruesse E, Glöckner FO, Ludwig W, Schleifer K-H, et al. (2014).  
314 Uniting the classification of cultured and uncultured bacteria and archaea using 16S  
315 rRNA gene sequences. Nat Rev Microbiol 12: 635-645.
